# Supplementary material for: Corneal Subbasal Plexus in Eyes with Fuchs’ Endothelial Corneal Dystrophy after Two Different Endothelial Surgeries
Source: Hindawi journal article supplement (doi:10.1155/2021/5098272), 2021-10-04
Supplement: f1 [file 5098272.f1.pdf]

| ID | SEX | Age | Surgery Type | Eye | Preoperative CDVA LogMar | Postoperative CDVA LogMar | Interface Reflectivity | Subepithelial Reflectivity | PSB       | Nerve Fibers                        |                                      |                  |             | BEADINGS           |                 | Tortuosity       |
|----|-----|-----|--------------|-----|--------------------------|---------------------------|------------------------|----------------------------|-----------|-------------------------------------|--------------------------------------|------------------|-------------|--------------------|-----------------|------------------|
|    |     |     |              |     |                          |                           |                        |                            |           | corneal fiber length (microm/frame) | corneal nerves fibers length density | number of fibers | bifurcation | number of beadings | beading density | tortuosity index |
| 1  | F   | 70  | DMEK         | od  | 0.70                     | 0.04                      | 176                    | 55                         | yes       | 539.79                              | 6074.05                              | 5                | 1           | 34                 | 69.68           | 8.73             |
| 2  | F   | 73  | DSAEK        | os  | 0.5                      | 0.15                      | 61                     | 58                         | no plexus |                                     |                                      |                  |             |                    |                 |                  |
| 3  | F   | 51  | DSAEK        | os  | 0.4                      | 0.04                      | 71                     | 63                         | yes       | 992.78                              | 11171.29                             | 7                | 4           | 70                 | 70.51           | 9.44             |
| 4  | M   | 69  | DSAEK        | os  | 0.5                      | 0.04                      | 63                     | 64                         | no plexus |                                     |                                      |                  |             |                    |                 |                  |
| 5  | M   | 72  | DMEK         | os  | 0.50                     | 0.00                      | 108                    | 66                         | no plexus |                                     |                                      |                  |             |                    |                 |                  |
| 6  | F   | 66  | DMEK         | os  | 0.40                     | 0.00                      | 96                     | 67                         | no plexus |                                     |                                      |                  |             |                    |                 |                  |
| 7  | F   | 71  | DMEK         | os  | 0.50                     | 0.00                      | 139                    | 70                         | yes       | 995.59                              | 11202.92                             | 6                | 2           | 71                 | 80.53           | 5.49             |
| 8  | F   | 71  | DMEK         | os  | 1.00                     | 0.00                      | 152                    | 72                         | yes       | 771.71                              | 8683.65                              | 4                | 1           | 43                 | 72.1            | 4.77             |
| 9  | F   | 58  | DMEK         | od  | 0.50                     | 0.04                      | 152                    | 84                         | yes       | 223.88                              | 2519.23                              | 1                | 0           | 19                 | 84.87           | 4                |
| 10 | M   | 63  | DMEK         | os  | 0.70                     | 0.00                      | 157                    | 87                         | no plexus |                                     |                                      |                  |             |                    |                 |                  |
| 11 | F   | 67  | DMEK         | os  | 1.00                     | 0.04                      | 81                     | 90                         | no plexus |                                     |                                      |                  |             |                    |                 |                  |
| 12 | M   | 69  | DSAEK        | od  | 0.4                      | 0                         | 63                     | 92                         | yes       | 267.89                              | 3014.42                              | 2                | 0           | 13                 | 48.53           | 6.13             |
| 13 | M   | 78  | DSAEK        | os  | 0.4                      | 0.04                      | 69                     | 96                         | yes       | 163.13                              | 1835.58                              | 1                | 0           | 9                  | 55.17           | 0                |
| 14 | F   | 62  | DSAEK        | od  | 0.7                      | 0.04                      | 102                    | 103                        | yes       | 1127.81                             | 12690.76                             | 7                | 0           | 46                 | 40.79           | 4.24             |
| 15 | F   | 74  | DSAEK        | os  | 0.4                      | 0.1                       | 125                    | 116                        | yes       | 411.73                              | 4632.95                              | 3                | 1           | 13                 | 34.43           | 6.07             |
| 16 | F   | 73  | DSAEK        | os  | 1                        | 0.1                       | 134                    | 116                        | yes       | 1047.13                             | 11782.87                             | 6                | 0           | 40                 | 38.2            | 3.81             |
| 17 | F   | 75  | DSAEK        | os  | 0.7                      | 0                         | 212                    | 119                        | yes       | 405.68                              | 4564.97                              | 2                | 0           | 23                 | 59.69           | 4.47             |
| 18 | M   | 63  | DMEK         | od  | 1.00                     | 0.00                      | 164                    | 120                        | yes       | 348.11                              | 3917.11                              | 2                | 0           | 22                 | 63.2            | 6.46             |
| 19 | F   | 59  | DMEK         | os  | 0.40                     | 0.00                      | 212                    | 128                        | yes       | 149.19                              | 1678.8                               | 1                | 0           | 9                  | 60.32           | 2.48             |
| 20 | F   | 63  | DMEK         | os  | 0.70                     | 0.10                      | 174                    | 128                        | no plexus |                                     |                                      |                  |             |                    |                 |                  |
| 21 | F   | 85  | DSAEK        | od  | 1                        | 0.15                      | 113                    | 129                        | no plexus |                                     |                                      |                  |             |                    |                 |                  |
| 22 | F   | 72  | DMEK         | od  | 1.00                     | 0.10                      | 118                    | 143                        | yes       | 387.27                              | 4357.78                              | 3                | 1           | 22                 | 66.94           | 3.94             |
| 23 | M   | 74  | DMEK         | os  | 0.30                     | 0.04                      | 161                    | 145                        | no plexus |                                     |                                      |                  |             |                    |                 |                  |
| 24 | F   | 77  | DMEK         | od  | 0.50                     | 0.10                      | 126                    | 145                        | no plexus |                                     |                                      |                  |             |                    |                 |                  |
| 25 | F   | 51  | DMEK         | od  | 0.40                     | 0.00                      | 185                    | 146                        | no plexus |                                     |                                      |                  |             |                    |                 |                  |
| 26 | F   | 84  | DMEK         | od  | 0.40                     | 0.10                      | 197                    | 161                        | no plexus |                                     |                                      |                  |             |                    |                 |                  |
| 27 | F   | 73  | DSAEK        | os  | 1                        | 0.1                       | 106                    | 162                        | no plexus |                                     |                                      |                  |             |                    |                 |                  |
| 28 | M   | 70  | DSAEK        | os  | 0.5                      | 0.1                       | 95                     | 166                        | no plexus |                                     |                                      |                  |             |                    |                 |                  |
| 29 | M   | 58  | DSAEK        | od  | 0.7                      | 0.1                       | 146                    | 174                        | no plexus |                                     |                                      |                  |             |                    |                 |                  |
| 30 | F   | 59  | DSAEK        | od  | 0.4                      | 0.04                      | 68                     | 188                        | no plexus |                                     |                                      |                  |             |                    |                 |                  |
| 31 | F   | 67  | DMEK         | os  | 0.7                      | 0.04                      | 171                    | 194                        | no plexus |                                     |                                      |                  |             |                    |                 |                  |
| 32 | F   | 73  | DSAEK        | od  | 1                        | 0.15                      | 116                    | 239                        | no plexus |                                     |                                      |                  |             |                    |                 |                  |
